# Supplementary material for: Graphene-based materials: the key for the successful application of pHEMA as a blood-contacting device
Source: Royal Society of Chemistry journal article supplement (doi:10.1039/d0bm01699c), 2021-01-01
Supplement: d0bm01699c1.pdf [file d0bm01699c1.pdf]

## Supporting Information

### Graphene based materials: the key for a successful application of pHEMA as a blood contacting device

*Andreia T. Pereira<sup>1,2,3\*</sup>, Patrícia C. Henriques<sup>1,2,4,5</sup>, Karl H. Schneider<sup>6,7</sup>, Ana L Pires<sup>8</sup>, André M Pereira<sup>8</sup>, Maria Cristina L. Martins<sup>1,2,9</sup>, Fernão D. Magalhães<sup>5</sup>, Helga Bergmeister<sup>6,7</sup>, Inês C. Gonçalves<sup>1,2\*</sup>*

<sup>1</sup>INEB – Instituto de Engenharia Biomédica, Universidade do Porto, Portugal;

<sup>2</sup>i3S – Instituto de Inovação e Investigação em Saúde, Universidade do Porto, Portugal;

<sup>3</sup>GABBA – Graduate Program in Areas of Basic and Applied Biology, Instituto de Ciências Biomédicas Abel Salazar, Universidade do Porto, Rua Jorge de Viterbo Ferreira 228, 4050-313, Porto, Portugal;

<sup>4</sup>FEUP – Faculty of Engineering, University of Porto, Rua Dr. Roberto Frias, 4200-465, Porto, Portugal;

<sup>5</sup>LEPABE – Laboratory for Process Engineering, Environment, Biotechnology and Energy, Faculty of Engineering, University of Porto, Portugal;

<sup>6</sup>Center for Biomedical Research Medical University of Vienna, Vienna, Austria;

<sup>7</sup>Ludwig Boltzmann Institute for Cardiovascular Research, Austria;

<sup>8</sup>IFIMUP – Instituto de Física de Materiais Avançados, Nanotecnologias e Fotonics, Departamento de Física e Astronomia, Faculdade de Ciências, Universidade do Porto, 4169-007 Porto, Portugal;

<sup>9</sup>ICBAS – Instituto de Ciências Biomédicas Abel Salazar, Universidade do Porto, Rua Jorge de Viterbo Ferreira 228, 4050-313, Porto, Portugal.

\*Corresponding Authors: \*andreia.pereira@i3s.up.pt, \*icastro@ineb.up.pt

**Table S.1.** – GBM used in this work.

| GO                                                                                           | GNP M5                                                                            | GNP M5ox                                                                          | GNP M15                                                                            | GNP M15ox                                                                           |
|----------------------------------------------------------------------------------------------|-----------------------------------------------------------------------------------|-----------------------------------------------------------------------------------|------------------------------------------------------------------------------------|-------------------------------------------------------------------------------------|
| 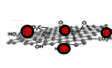            |  |  |  |  |
| ≈ 1.5 μm                                                                                     | 5 μm                                                                              | 5 μm                                                                              | 15 μm                                                                              | 15 μm                                                                               |
| Obtained from oxidation of graphite through MHM and exfoliated in ultrasound water bath (6h) | Commercially available                                                            | Obtained from oxidation of GNP M5 through MHM.                                    | Commercially available                                                             | Obtained from oxidation of GNP M5 through MHM.                                      |

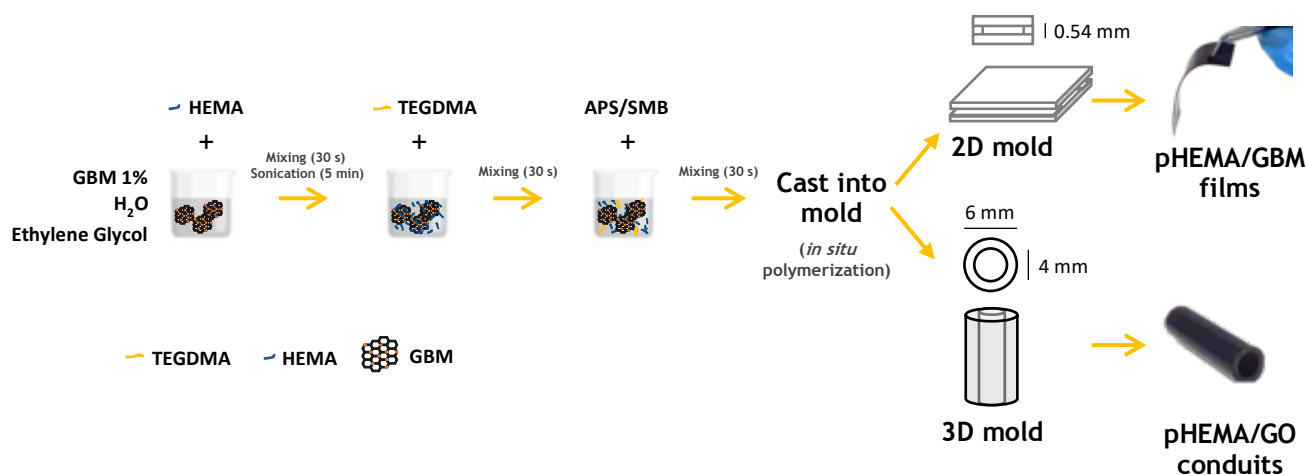

**Scheme S.1** – Preparation of pHEMA/GBM films and conduits.

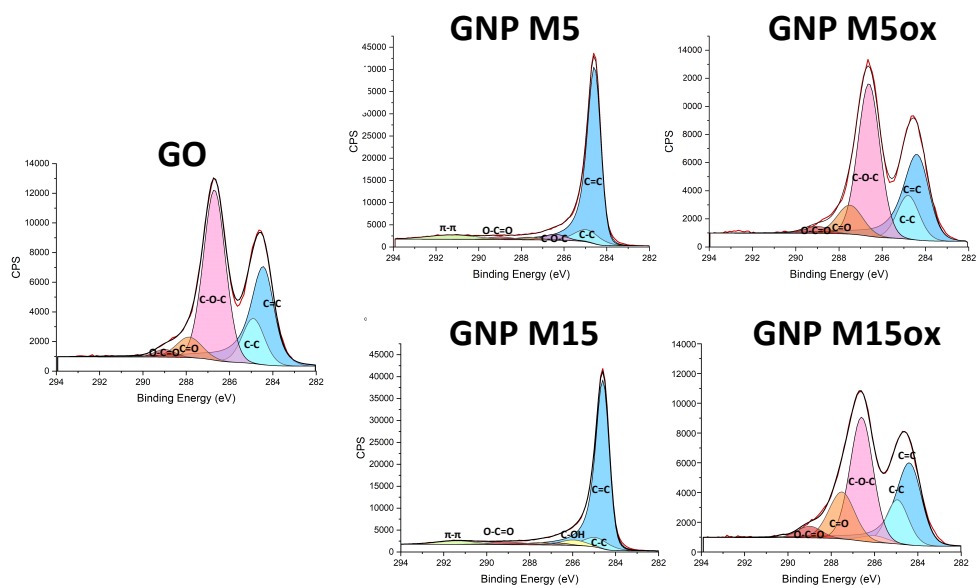

| Chemical group (%) |                                       |                                       |                          |                           |                         |                           |                         |
|--------------------|---------------------------------------|---------------------------------------|--------------------------|---------------------------|-------------------------|---------------------------|-------------------------|
| GBMs               | C sp <sup>2</sup><br>(284.2–284.5 eV) | C sp <sup>3</sup><br>(284.8–284.9 eV) | C-OH<br>(285.3–286.0 eV) | C-O-C<br>(286.1–286.6 eV) | C=O<br>(287.5–287.9 eV) | O-C=O<br>(288.8–288.9 eV) | π-π<br>(290.0–292.0 eV) |
| GO                 | 34.0                                  | 12.0                                  | -                        | 45.4                      | 6.4                     | 1.9                       | 0.3                     |
| GNP M5             | 77.6                                  | 8.5                                   | 0.5                      | 3.6                       | 1.8                     | 2.0                       | 6.1                     |
| GNP M5ox           | 32.9                                  | 12.3                                  | -                        | 43.0                      | 9.5                     | 2.1                       | 0.3                     |
| GNP M15            | 78.4                                  | 7.1                                   | 4.0                      | 1.4                       | 1.8                     | 3.2                       | 4.1                     |
| GNP M15ox          | 31.1                                  | 12.2                                  | 2.2                      | 35.8                      | 15.2                    | 3.4                       | 0.1                     |

**Figure S.1** – C1s high resolution spectra of GO, GNP M5, GNP M5ox, GNP M15 and GNP M15ox.

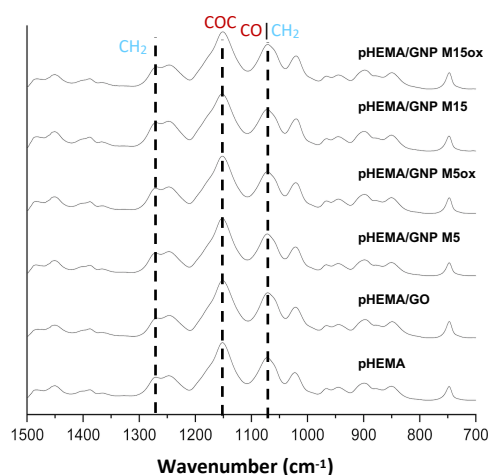

**Figure S.2** - Infrared spectra of pHEMA and pHEMA/GBMs composites.

**Table S.2** - Solubility of different formulations of pHEMA and pHEMA/GBM without TEGDMA in different solvents

| Solvent | pHEMA | pHEMA          |        |          |         |           |
|---------|-------|----------------|--------|----------|---------|-----------|
|         |       | GO             | GNP M5 | GNP M5ox | GNP M15 | GNP M15ox |
|         |       | Without TEGDMA |        |          |         |           |
| DMF     | ✗     | ✓              | ✗      | ✓        | ✗       | ✓         |
| DMSO    | ✗     | ✓              | ✗      | ✓        | ✗       | ✓         |
| THF     | ✗     | ✗              | ✗      | ✗        | ✗       | ✗         |
| Hexane  | ✗     | ✗              | ✗      | ✗        | ✗       | ✗         |
| Ethanol | ✗     | ✓              | ✗      | ✓        | ✗       | ✓         |

a)

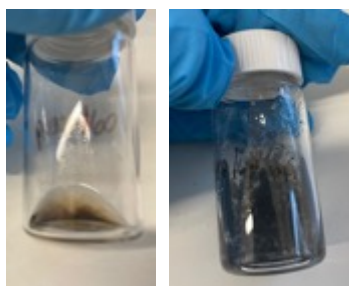

b)

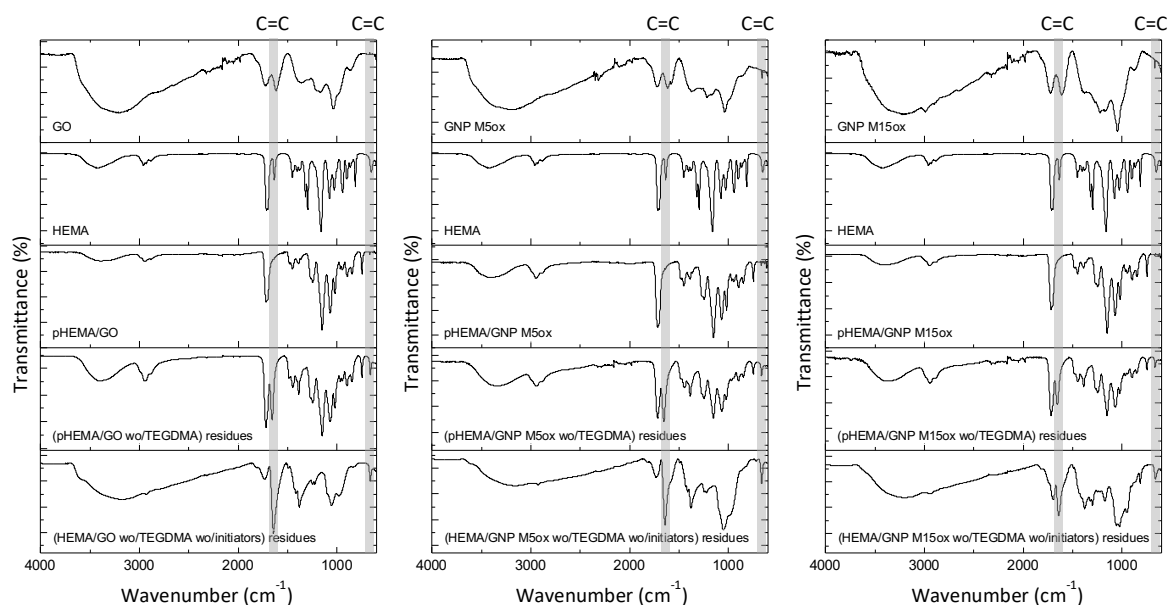

**Figure S.3** – a) Representative images of pHEMA/GO (on the left) and pHEMA/GNP M15 (on the right) without TEGDMA after contact with DMF under stirring overnight. b) FTIR spectrum of GBM, HEMA monomers, pHEMA/GBMs, (pHEMA/GBMs wo/TEGDMA) residues and (HEMA/GBMs wo/TEGDMA wo/initiators) residues (from top to bottom spectra of each graph). Each graph corresponds to a GBM material. Residues were obtained by dissolving the materials in DMF followed by rinsing and drying.

**Table S.3** – Zeta potential of GBM in dH<sub>2</sub>O and polymerization media.

| Dispersant                                                                        | Zeta potential (mV) |              |               |              |              |
|-----------------------------------------------------------------------------------|---------------------|--------------|---------------|--------------|--------------|
|                                                                                   | GO                  | M5           | GBM           |              |              |
|                                                                                   |                     |              | M5ox          | M15          | M15ox        |
| <b>dH<sub>2</sub>O</b>                                                            | -33.0 ± 1.46        | -3.27 ± 1.26 | -36.6 ± 0.85  | -7.06 ± 3.37 | -35.1 ± 1.23 |
| <b>Polymerization media</b><br>(dH <sub>2</sub> O, Ethylene Glycol, HEMA, TEGDMA) | -0.461 ± 0.05       | 0.167 ± 0.03 | -0.766 ± 0.07 | 0.246 ± 0.02 | -1.07 ± 0.13 |

**Table S.4** – Pig information, blood profiles evaluated by a hematology analyzer (Advia 2120, Siemens Healthineers)

| Weight                                   | Pig 1<br>57 kg          |                         | Pig 2<br>55 kg          |                         |
|------------------------------------------|-------------------------|-------------------------|-------------------------|-------------------------|
|                                          | Before                  | After                   | Before                  | After                   |
| Body temperature                         | 38.9                    | 39.8                    | 39                      | 39.5                    |
| White Blood Cells<br>(cells/ $\mu$ L)    | 11.91 x 10 <sup>3</sup> | 12.58 x 10 <sup>3</sup> | 20.02 x 10 <sup>3</sup> | 18.87 x 10 <sup>3</sup> |
| Red Blood Cells<br>(cells/ $\mu$ L)      | 5.40 x 10 <sup>6</sup>  | 6.15 x 10 <sup>6</sup>  | 5.96 x 10 <sup>6</sup>  | 5.86 x 10 <sup>6</sup>  |
| Platelets<br>(cells/ $\mu$ L)            | 221 x 10 <sup>3</sup>   | 242 x 10 <sup>3</sup>   | 386 x 10 <sup>3</sup>   | 368 x 10 <sup>3</sup>   |
| Platelets clumps                         | No                      | No                      | No                      | No                      |
| Blood pressure<br>(mmHg)                 | 100/70                  | 99/78                   | 99/78                   | 97/70                   |
| Blood flow<br>Carotid Artery<br>(mL/min) | 201                     | -                       | 200<br>(mL/min)         | -                       |
